# Supplementary material for: A multi-center study on low-frequency rTMS combined with intensive occupational therapy for upper limb hemiparesis in post-stroke patients
Source: Springer Nature journal article supplement (doi:10.1186/1743-0003-9-4), 2012-01-20

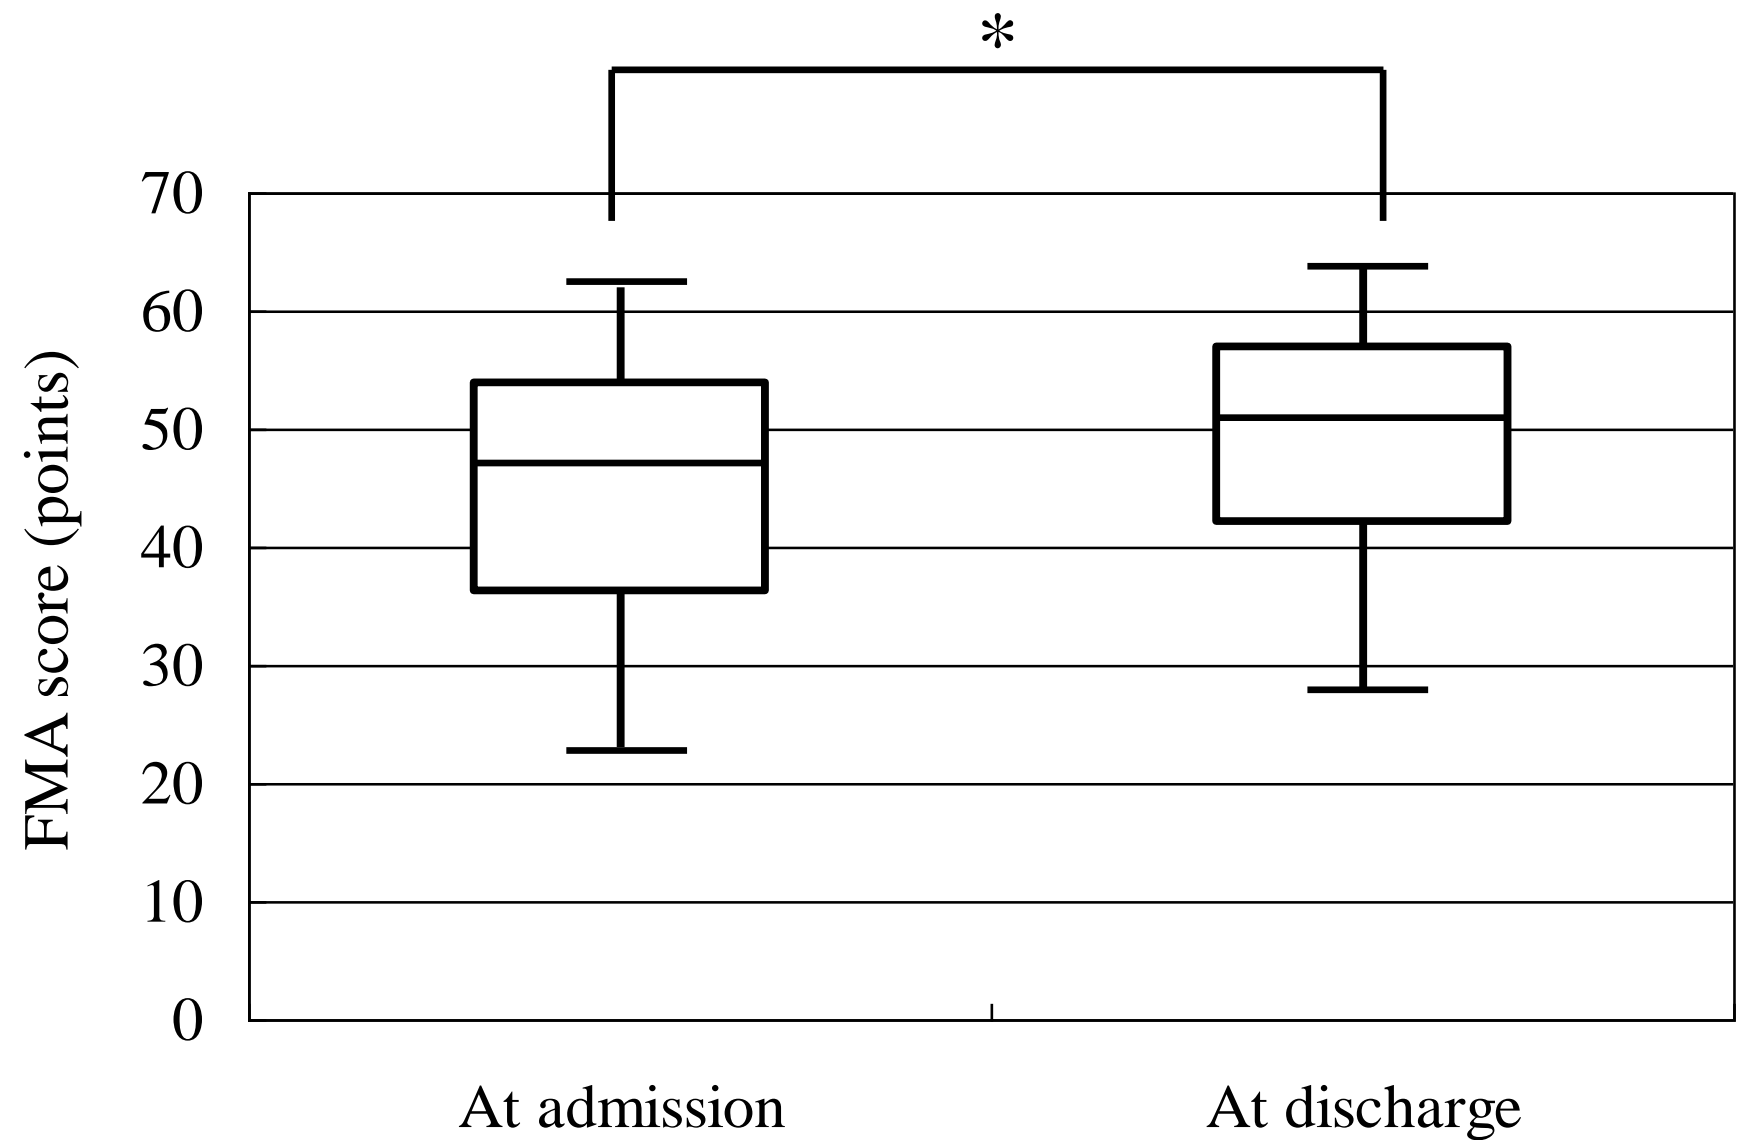

Supplement: 12984_2011_332_MOESM2_ESM.pdf [file 12984_2011_332_MOESM2_ESM.pdf]
