# Supplementary material for: A multi-center study on low-frequency rTMS combined with intensive occupational therapy for upper limb hemiparesis in post-stroke patients
Source: Springer Nature journal article supplement (doi:10.1186/1743-0003-9-4), 2012-01-20
Supplement: 12984_2011_332_MOESM5_ESM.pdf [file 12984_2011_332_MOESM5_ESM.pdf]

WMFT log performance time

5  
4.5  
4  
3.5  
3  
2.5  
2  
1.5  
1  
0.5  
0

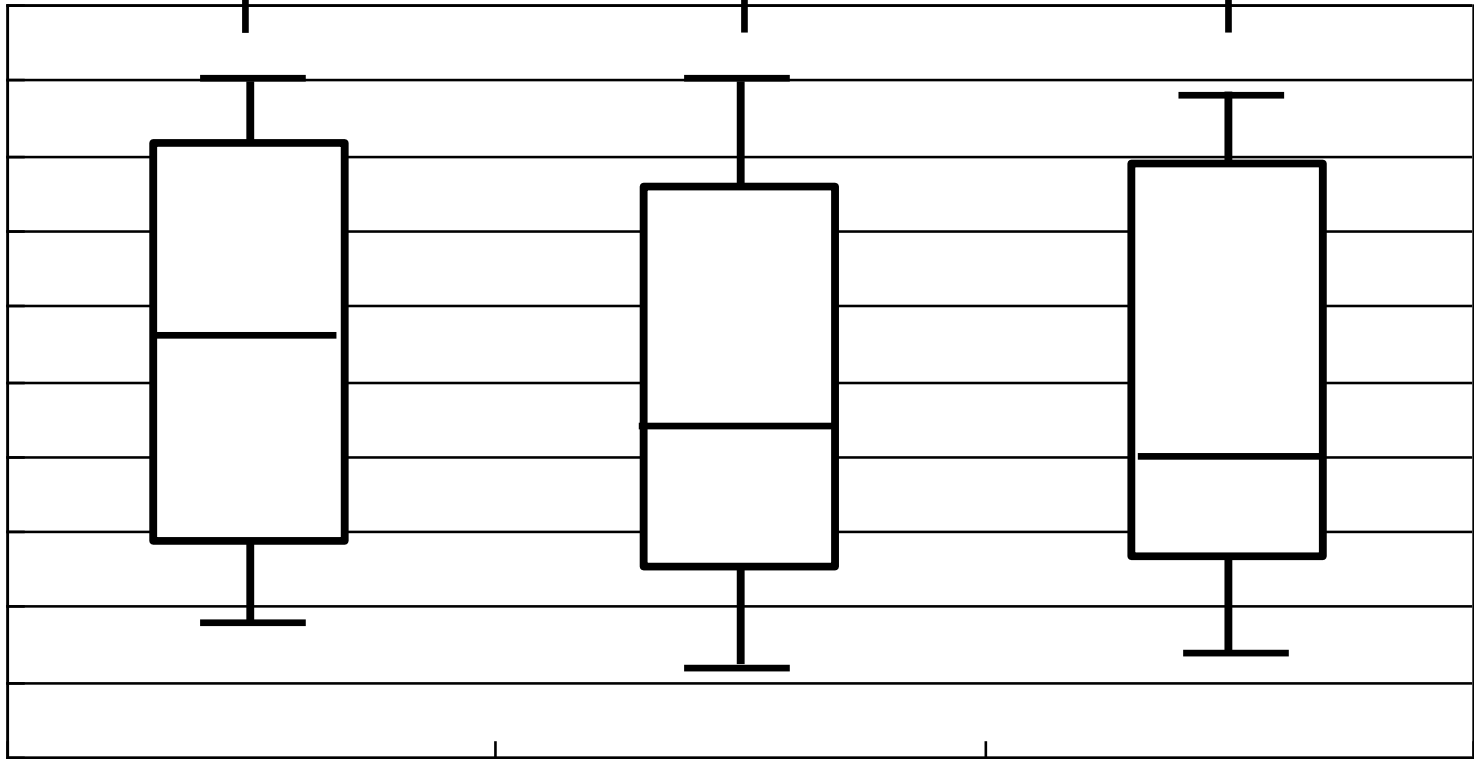

At admission

At discharge

4 weeks after  
discharge
